# Supplementary material for: Self-gelation involved in the transformation of resveratrol and piperine from a co-amorphous system into a co-crystal system
Source: Royal Society of Chemistry journal article supplement (doi:10.1039/d2ce00671e), 2022-01-01
Supplement: d2ce00671e1.pdf [file d2ce00671e1.pdf]

## Supporting Information

### Self-gelation involved in transformation from co-amorphous system of resveratrol and piperine into a co-crystal system

Jiawei Han<sup>‡ab</sup>, Luyuan Li<sup>‡a</sup>, Qian Yu<sup>‡a</sup>, Daoyi Zheng<sup>c</sup>, Yutong Song<sup>c</sup>, Jianjun Zhang<sup>c</sup>,  
Yuan Gao<sup>a</sup>, Weili Heng<sup>a</sup>, Shuai Qian<sup>\*a</sup>, Zunting Pang<sup>\*a</sup>

<sup>a</sup> School of Traditional Chinese Pharmacy, China Pharmaceutical University, Nanjing, 211198, P.R., China

<sup>b</sup> School of Pharmacy, Changzhou University, Changzhou, 213164, P.R., China

<sup>c</sup> School of Pharmacy, China Pharmaceutical University, Nanjing, 211198, P.R., China

---

<sup>‡</sup> These authors contributed equally to this work.

Corresponding authors and address for reprint:

\* Corresponding authors

Dr. Shuai Qian

School of Traditional Chinese Pharmacy, China Pharmaceutical University, Nanjing,

Tel.: +86 139 1595 7175;

E-mail: [silence\\_qs@163.com](mailto:silence_qs@163.com)

Dr. Zunting Pang

School of Traditional Chinese Pharmacy, China Pharmaceutical University, Nanjing,

Tel.: +86 152 9577 1726;

E-mail: [15295771726@163.com](mailto:15295771726@163.com)

1 **Table S1** Comparisons between co-crystal and co-amorphous systems

| <b>Items</b>                           | <b>Co-crystal system</b>                           | <b>Co-amorphous system</b>              |
|----------------------------------------|----------------------------------------------------|-----------------------------------------|
| Solid form                             | Crystalline solid                                  | Amorphous solid                         |
| Molecular packing                      | Periodic molecular arrangement                     | Long-range disorder molecular packing   |
| Components                             | Binary or multi-components                         |                                         |
| Co-former                              | Small molecules (excipients or drugs)              |                                         |
| Intermolecular interactions            | Noncovalent interactions                           | Noncovalent interactions/No interaction |
| Stoichiometric ratio                   | A certain stoichiometric ratio                     | A certain stoichiometric ratio          |
| Melting temperature ( $T_m$ )          | A single $T_m$                                     | N/A                                     |
| Glass transition temperature ( $T_g$ ) | N/A                                                | A single $T_g$                          |
| Thermodynamics                         | Low-energy state                                   | High-energy state                       |
| Solubility                             | Improvement (depending on the nature of co-former) |                                         |
| Dissolution                            | Improvement (depending on the nature of co-former) |                                         |

2 N/A = not available.

3

#### 4 1. Preparation of RES-PIP CM and RES-PIP CC

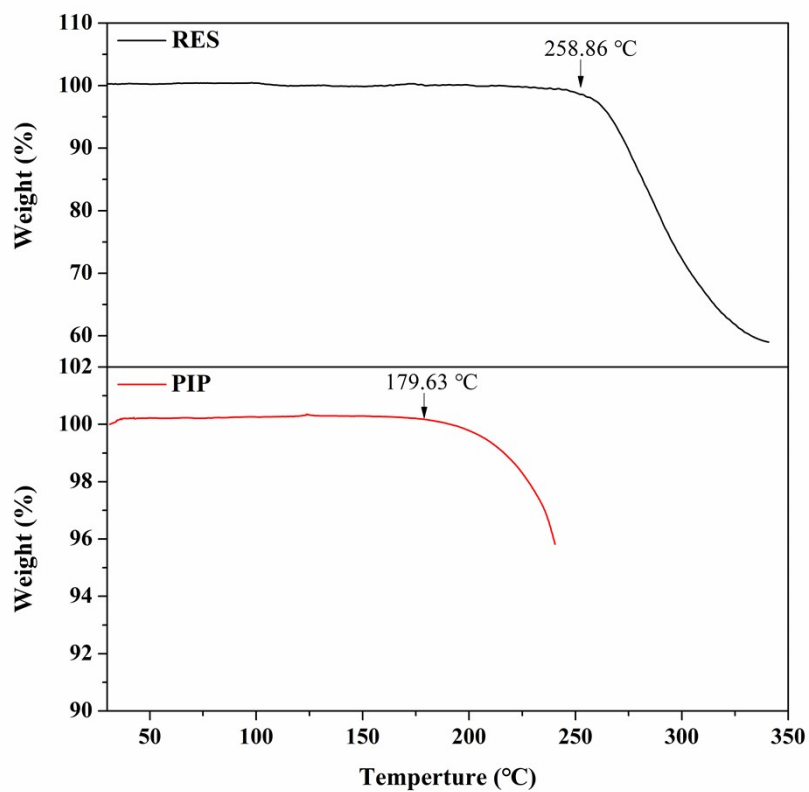

5

6 **Fig. S1** TGA charts of crystalline RES and crystalline PIP.

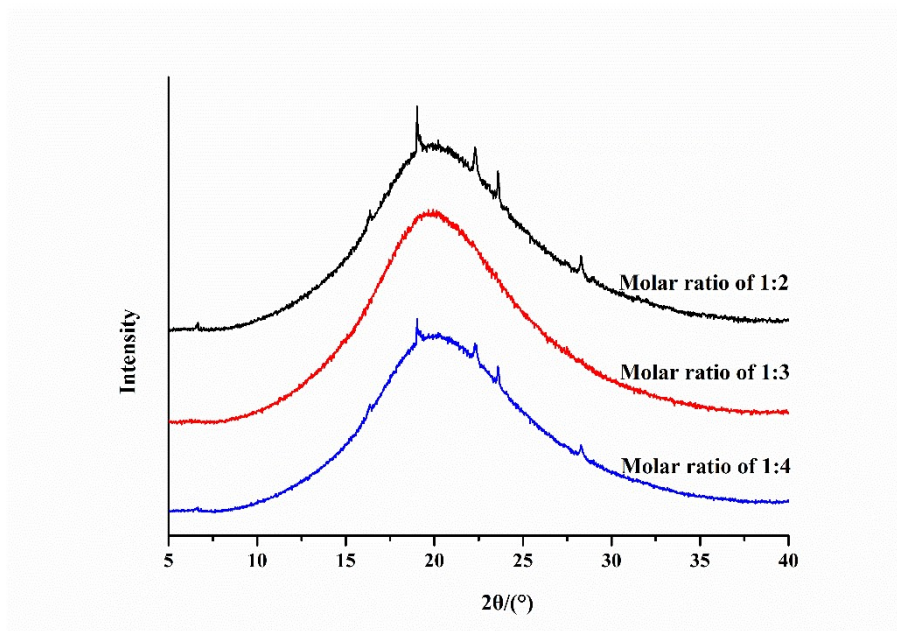

7

8 **Fig. S2** XRPD diffractograms of the prepared product with molar ratios (RES/PIP) of

9 1:2, 1:3 and 1:4 by quench cooling.

10

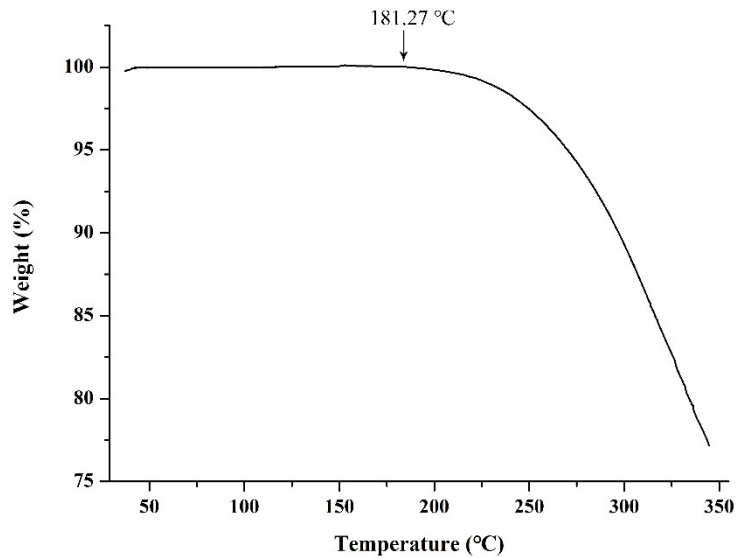

11

12 **Fig. S3** TGA chart of RES-PIP CC.

13

## 14 **2. Determination of drug content in RES-PIP CM and RES-PIP CC**

15 The analysis was conducted on the LC-2010A HPLC analysis system (Shimadzu Co.,  
16 Ltd., Tokyo, Japan) with an Ultimate C18 column (5  $\mu$ m, 250 mm  $\times$  4.6 mm) at 35  $^{\circ}$ C.

17 The mobile phase (50:50, acetonitrile to 0.3% phosphoric acid solution) was pumped  
18 up at 1 mL/min for 15 min. RES and PIP were detected at 306 and 342 nm, respectively.

19 The retention time of RES and PIP were 3.5 min and 12.6 min, respectively. The  
20 calibration curves were linear over a range of 0.23-120.0  $\mu$ g/mL for RES and 0.89-

21 56.75  $\mu$ g/mL for PIP, with the correlation coefficients of around 0.999.

22

23 **3. DSC analysis**

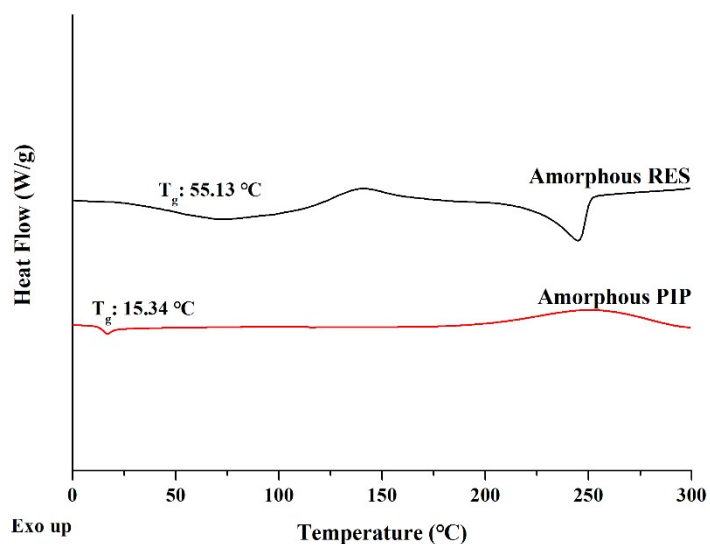

24

25 **Fig. S4** DSC thermograms of amorphous RES and amorphous PIP prepared *in situ*  
 26 using differential scanning calorimetry.

27

28 **Table S2** The predicted and experimental  $T_g$  of the RES-PIP CM system.

| Sample        | Weight fraction | Experimental $T_g$ , °C | Calculated $T_g$ , °C | $\Delta T_g$ , °C |
|---------------|-----------------|-------------------------|-----------------------|-------------------|
| Amorphous RES | 0.21            | 55.13                   | /                     | /                 |
| Amorphous PIP | 0.79            | 15.34                   | /                     | /                 |
| RES-PIP CM    | /               | 32.66                   | 18.08                 | 14.58             |

29

30 **4. Crystal structure solution and refinement**

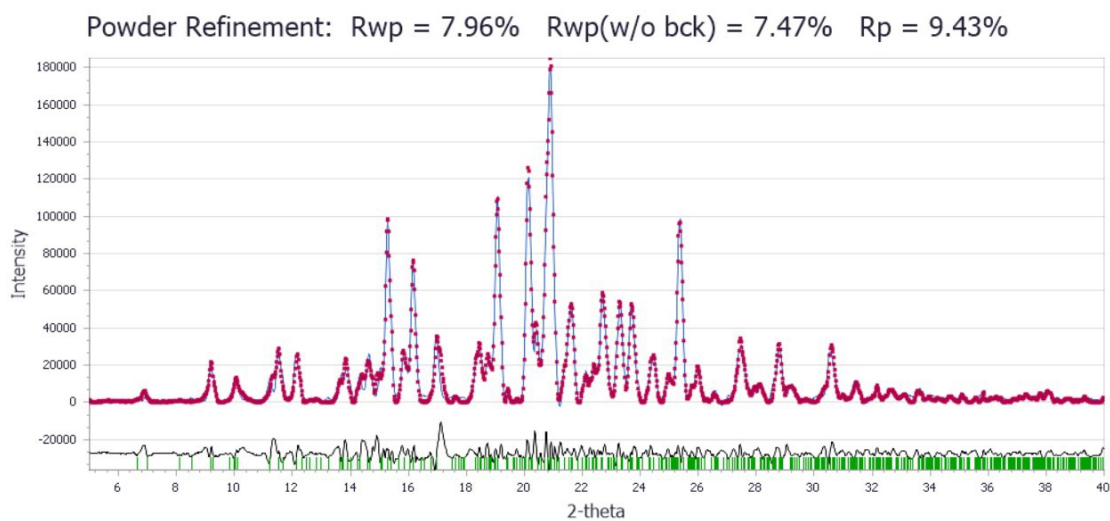

32 **Fig. S5** The measured X-ray powder diffraction patterns (blue), Rietveld refinements  
33 (red) and underneath the difference curves (black) of RES-PIP CC. The green tick  
34 marks indicated reflection positions.

35

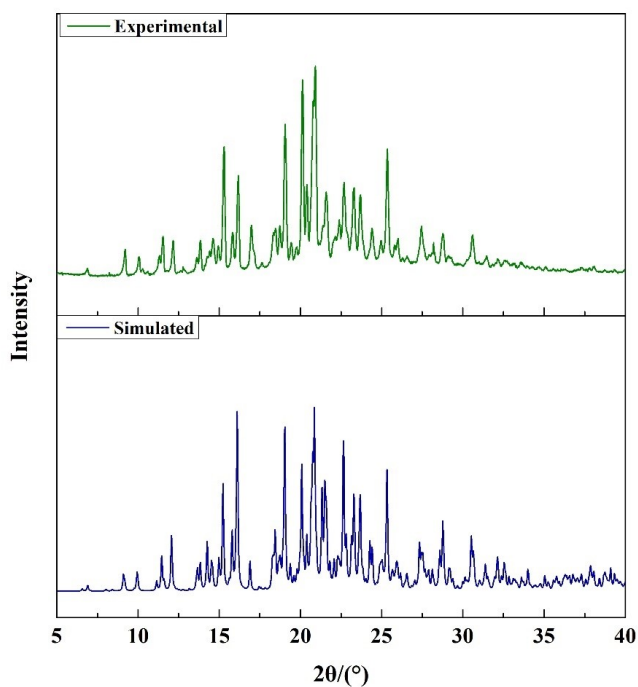

37 **Fig. S6** Comparison of experimental and simulated patterns of RES-PIP CC.

38

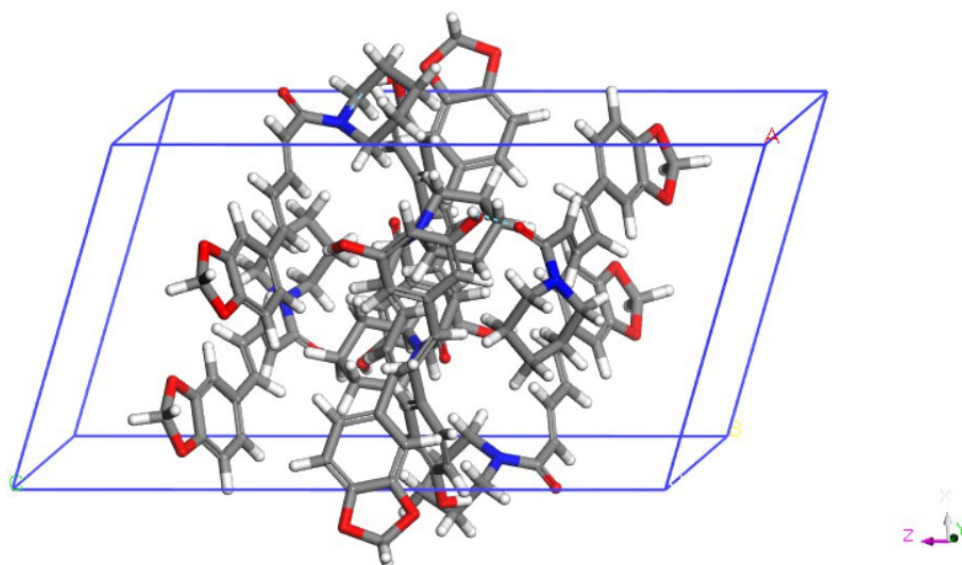

39

40 **Fig. S7** The simulated structure of RES-PIP CC.

41

42 **Table S3** Crystallographic data of RES-PIP CC.

| Parameters                | RES-PIP CC                                    |
|---------------------------|-----------------------------------------------|
| Formula                   | $(C_{14}H_{12}O_3) \cdot 3(C_{17}H_{19}NO_3)$ |
| Space group               | $P\bar{1}$                                    |
| Crystal system            | Triclinic                                     |
| $a(\text{\AA})$           | 14.2960                                       |
| $b(\text{\AA})$           | 10.0719                                       |
| $c(\text{\AA})$           | 23.7853                                       |
| $\alpha(^{\circ})$        | 84.8598                                       |
| $\beta(^{\circ})$         | 112.3810                                      |
| $\gamma(^{\circ})$        | 105.4870                                      |
| Volume ( $\text{\AA}^3$ ) | 3051.56                                       |
| $R_{wp}\%$                | 7.96%                                         |

43

44 **Table S4** Hydrogen bond parameters for RES-PIP CC.

| D-H...A                 | D...A/ $\text{\AA}$ | H...A/ $\text{\AA}$ | D-H...A/ $^{\circ}$ |
|-------------------------|---------------------|---------------------|---------------------|
| O7-H (RES)...O15 (PIP)  | 2.987               | 2.378               | 121.831             |
| O17-H (RES)...N16 (PIP) | 2.825               | 2.047               | 138.243             |

## 45 **5. Polarizing light microscopy (PLM) and scanning electron microscopy (SEM)**

### 46 **Methods**

#### 47 *5.1. PLM*

48 A small amount of sample including crystalline RES, crystalline PIP, RES-PIP CM and  
49 RES-PIP CC was placed on a glass slide and dispersed with liquid paraffin. The surface  
50 morphology and birefringence phenomenon were observed and recorded by PLM  
51 (Eclipse Ci-POL, Nikon Ltd., Tokyo, Japan) under  $10 \times 20$  times magnification.

#### 52 *5.2. SEM*

53 The surface morphology of crystalline RES, crystalline PIP, RES-PIP CM and RES-  
54 PIP CC was observed by a SEM system (GeminiSEM 360, ZEISS Ltd., Jena,  
55 Germany). The sample was coated with a thin layer of gold and fixed on an SEM stub  
56 before observation. The SEM system was operated with probe current of 9400 nA,  
57 accelerating voltage of 3 kV, and counting time of 60 s, respectively. Furthermore, the  
58 gel formed from RES-PIP CM was also inspected by SEM to obtain its surface  
59 structure.

### 60 **Results and discussion**

61 PLM observation was conducted to analyze the morphology and birefringence behavior  
62 of the samples. Crystalline RES and crystalline PIP exhibited long flake state and  
63 irregular sphericity with obvious crystal birefringence, respectively (Fig. S8A & B). In  
64 contrast, the RES-PIP CM showed irregular block shapes without the birefringence  
65 phenomenon, indicating a complete amorphousness (Fig. S8C). While, RES-PIP CC  
66 appeared a regular long block or flake and visual crystal birefringence (Fig. S8D).



67 Furthermore, SEM was further applied to detect particle morphology after co-  
68 amorphization and co-crystallization. Similar to PLM observation, the micrograph of  
69 crystalline RES showed a long flake or columnar-like crystal shape (Fig. S8E), and  
70 crystalline PIP exhibited an ellipsoid or spherical state with rough surface (Fig. S8F).  
71 However, RES-PIP CM displayed irregularly lumpy or granular shapes after co-  
72 amorphization (Fig. S8G). For RES-PIP CC, it showed a regular long block shape after  
73 co-crystallization (Fig. S8H).

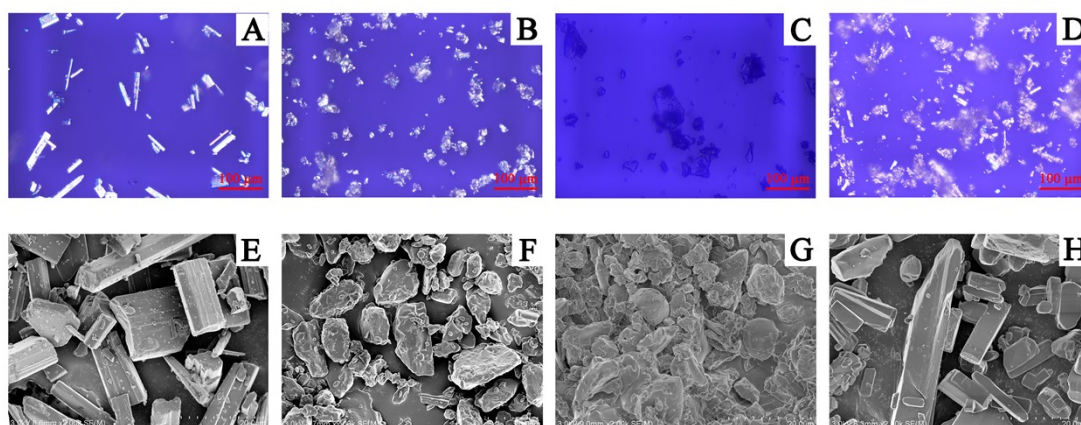

74  
75 **Fig. S8** PLM and SEM images of (A, E) crystalline RES, (B, F) crystalline PIP, (C, G)  
76 RES-PIP CM and (D, H) RES-PIP CC.

77 **6. Ss <sup>13</sup>C NMR analysis**78 **Table S5** Resonance assignments of RES and PIP in <sup>13</sup>C NMR spectra in solid state.

| Compound | Carbon Number | Chemical shift (ppm) |
|----------|---------------|----------------------|
| RES      | 1, 3          | 156.10               |
|          | 14            | 154.07               |
|          | 5             | 138.93               |
|          | 12, 16        | 133.40               |
|          | 11            | 129.30               |
|          | 9, 10         | 125.40               |
|          | 13, 15        | 117.47               |
|          | 4, 6          | 110.62               |
|          | 2             | 102.70               |
| PIP      | 14            | 164.01               |
|          | 4, 5          | 148.86               |
|          | 12            | 142.00               |
|          | 10            | 135.98               |
|          | 7             | 131.33               |
|          | 11            | 125.62               |
|          | 8, 13         | 119.59               |
|          | 9             | 107.30               |
|          | 6             | 104.82               |
|          | 2             | 102.88               |
|          | 17, 21        | 43.87                |
|          | 18, 19, 20    | 25.73                |

80 **7. Transformation from RES-PIP CM to RES-PIP CC**

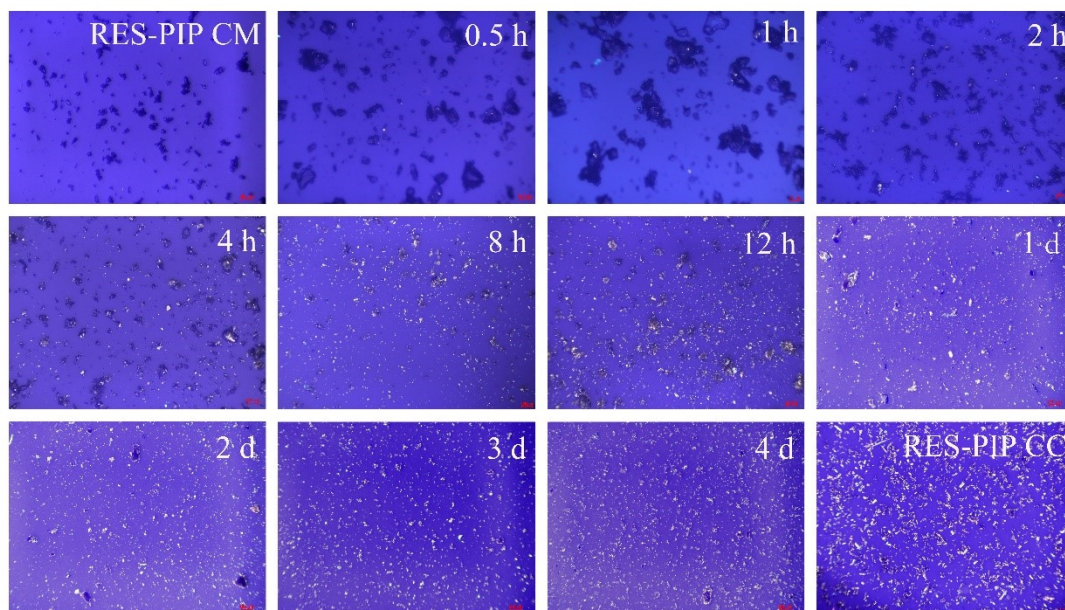

81

82 **Fig. S9** PLM photographs of samples collected during dissolution of RES-PIP CM at  
83 different time.

84

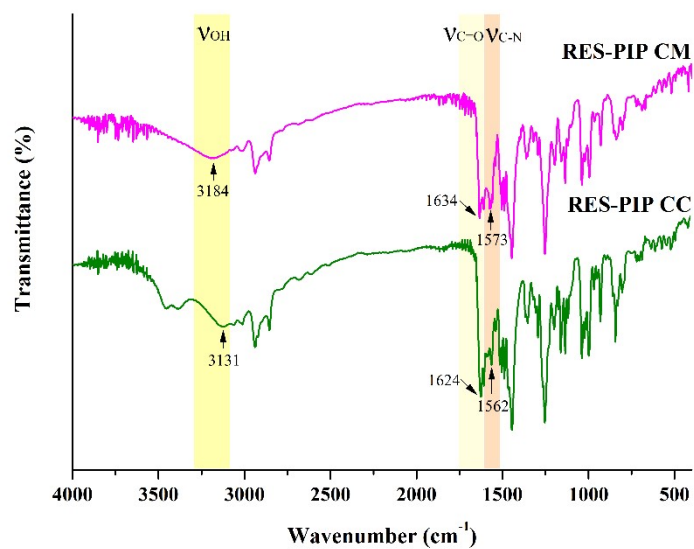

85

86 **Fig. S10** FTIR spectra of RES-PIP CM and RES-PIP CC.

87

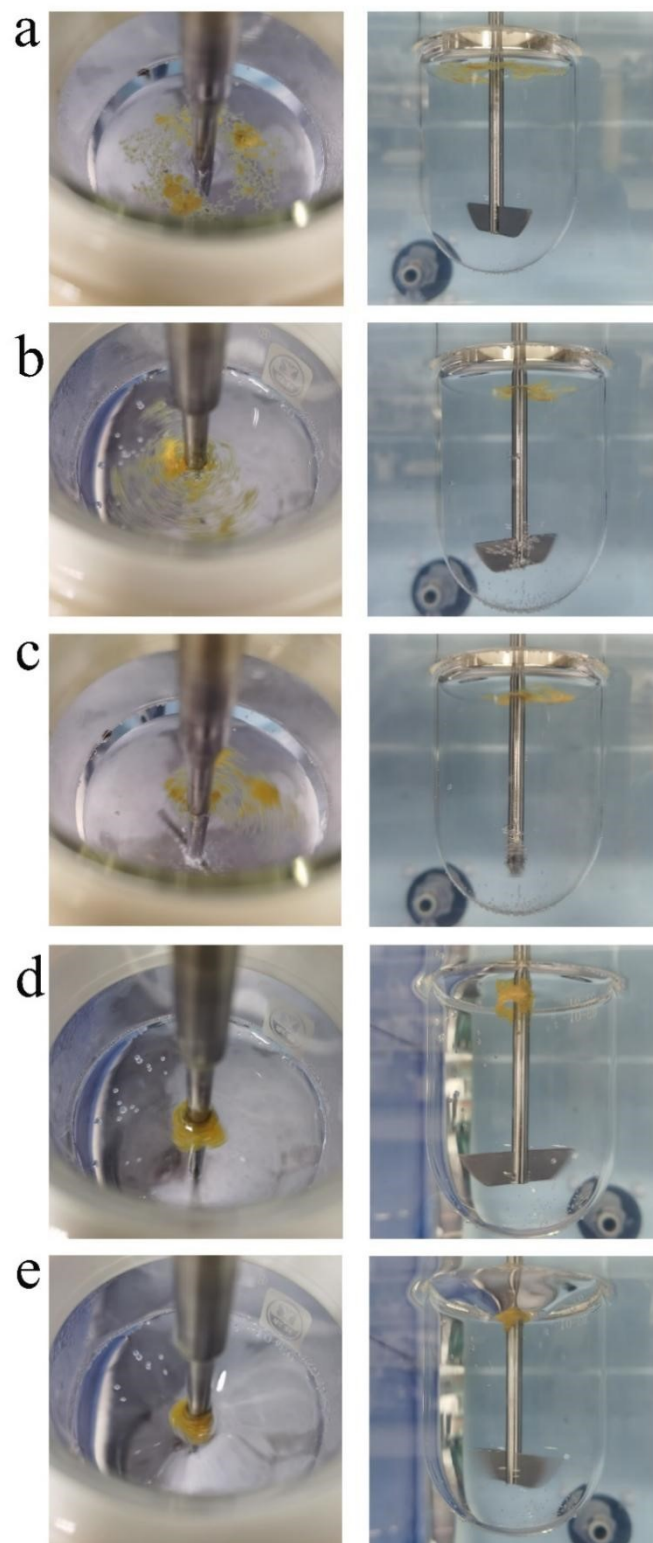

88

89 **Fig. S11** Dissolution phenomena of RES-PIP CM at (a) 25, (b) 50, (c)100, (d) 150 and

90 (e) 200 rpm.

91

## 92 **8. Binding energy calculation between components**

### 93 **Methods**

94 Molecular dynamics (MD) simulation was used to calculate the binding energy ( $E_{\text{bind}}$ )  
95 between components (including RES/RES, PIP/PIP and RES/PIIP) and further explore  
96 such transformation mechanism.  $E_{\text{bind}}$  is defined as the intermolecular interaction  
97 energy between different components.  $E_{\text{bind}}$  obtained from MD simulation has been  
98 widely used to evaluate the interaction of components, especially in the field of co-  
99 crystal explosives.<sup>1-5</sup>

100 The geometric structures of RES molecule and PIP molecule were optimized by  
101 Forcite module with the COMPASS II force field using Materials Studio software  
102 (version 2019, BIOVIA) to achieve the minimized energy structures.<sup>6, 7</sup> Amorphous  
103 cells of RES and PIP were established based on the molar ratios of RES-PIP CM and  
104 their respective densities (1.410 g/cm<sup>3</sup> for RES and 1.303 g/cm<sup>3</sup> for PIP) from  
105 Cambridge Crystallographic Data Centre. Next, the layered model of RES/PIP was  
106 built using RES amorphous cell as the first layer and PIP amorphous cell as the second  
107 layer. Similarly, the layered models of RES/RES and PIP/PIP were also established  
108 based on their respective amorphous cells. After the layered models were optimized to  
109 minimize the energy, COMPASS II force field and NPT ensemble were selected for  
110 MD simulation, and Andersen thermostat was selected for the temperature control.  
111 Meanwhile, the van der Waals force was simulated according to the Atom Based  
112 method, and the Electrostatic process is calculated with Ewald.<sup>3, 6-8</sup> The total simulation  
113 time was 200 ps and the time step was 1 fs. The temperature was set as 298 K, 310 K

114 and 318 K, respectively. Finally, the equilibrium layered structures of RES/PIP,  
115 RES/RES and PIP/PIP at different temperatures could be obtained to calculate the  $E_{\text{bind}}$   
116 between components.

117 The  $E_{\text{bind}}$  was depicted as follows, and the greater the  $E_{\text{bind}}$ , the stronger the  
118 interaction of components.<sup>6-8</sup>

$$119 \quad E_{\text{bind}} = -E_{\text{inter}} = -[E_{\text{total}} - (E_{\text{layer}(1)} + E_{\text{layer}(2)})]$$

120 Where  $E_{\text{bind}}$  is the binding energy of system,  $E_{\text{inter}}$  is the interaction energy between  
121 molecules,  $E_{\text{total}}$  is the total energy of the whole equilibrium structure,  $E_{\text{layer}(1)}$  and  
122  $E_{\text{layer}(2)}$  represent the total energy of the first layer and the second layer, respectively.

123

## 124 **Results and discussion**

125 MD simulation was conducted to study the dynamic parameters and structural  
126 properties of the RES-PIP system, in order to explore the transformation mechanism  
127 from RES-PIP CM to RES-PIP CC. The stable structure is formed by the strong  
128 intermolecular interactions (especially intermolecular hydrogen bonds) between  
129 components in co-amorphous system. The MD methods were used to build the  
130 amorphous cell models of RES and PIP (Fig. S12), the layered models of RES/RES,  
131 PIP/PIP and RES/PIP were constructed using RES amorphous cell and PIP amorphous  
132 cell (Fig. S13), and the layered structures were optimized and run by MD simulation at  
133 different temperatures to obtain the equilibrium structures (Fig. S14-S16). On this basis,  
134 the binding energy ( $E_{\text{bind}}$ ) of RES/RES, PIP/PIP and RES/PIP was calculated in Table  
135 S6. The  $E_{\text{bind}}$  reflects the strength of intermolecular interactions between components.<sup>6-8</sup>

136 The greater  $E_{\text{bind}}$  means the stronger interactions and the more stable internal structure  
137 of the system. According to the analysis of MD simulation, the  $E_{\text{bind}}$  between RES and  
138 PIP in the RES-PIP CM system at 298 K, 310 K and 318 K was approximately 1190  
139 kcal/mol, 1124 kcal/mol and 1093 kcal/mol, respectively, which were significantly  
140 greater ( $p < 0.01$ ) than those between the single components (i.e., RES/RES, PIP/PIP),  
141 indicating that the strongest intermolecular interactions between RES and PIP than  
142 those of the same components.

143

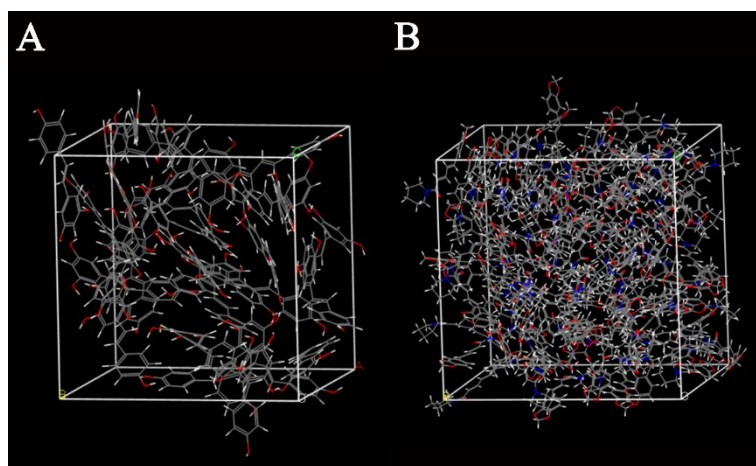

144

145 **Fig. S12** Amorphous cells of (A) RES molecules and (B) PIP molecules.

146

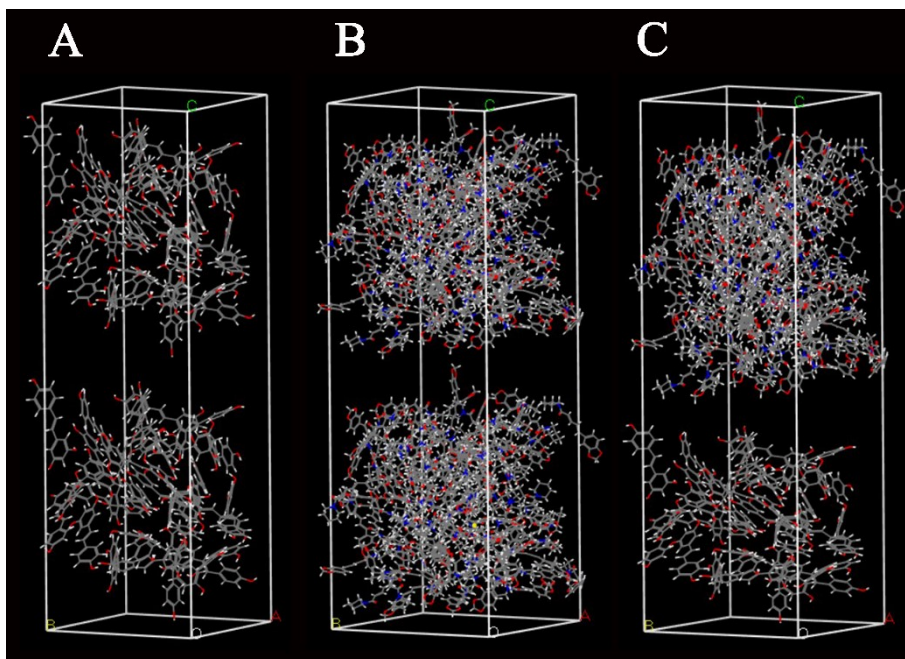

147

148 **Fig. S13** The initial layered structures of (A) RES/RES, (B) PIP/PIP and (C) RES/PIP  
 149 built by amorphous cells.

150

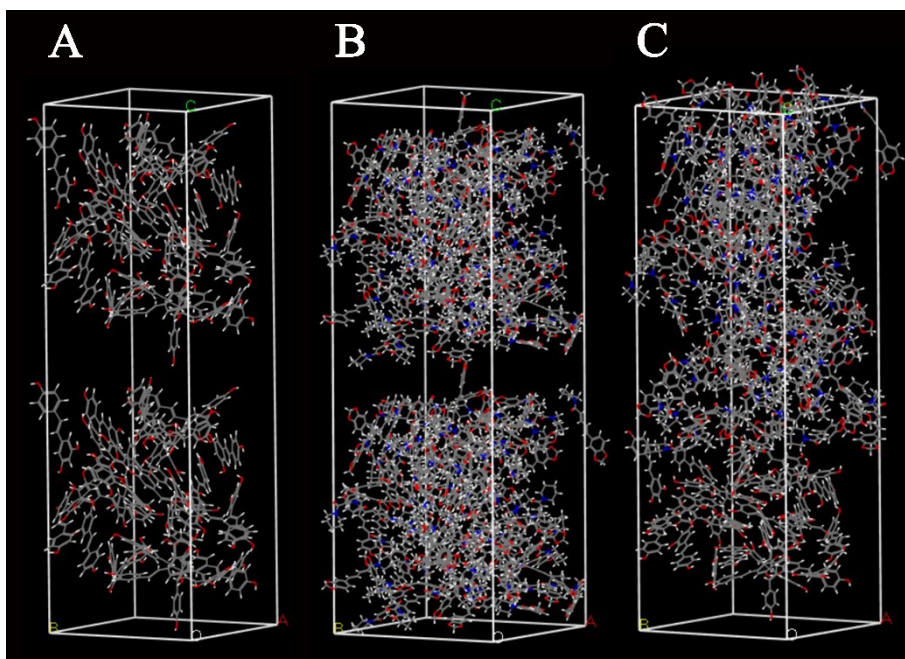

151

152 **Fig. S14** Equilibrium layered structures of (A) RES/RES, (B) PIP/PIP and (C) RES/PIP  
 153 at 298 K.

154



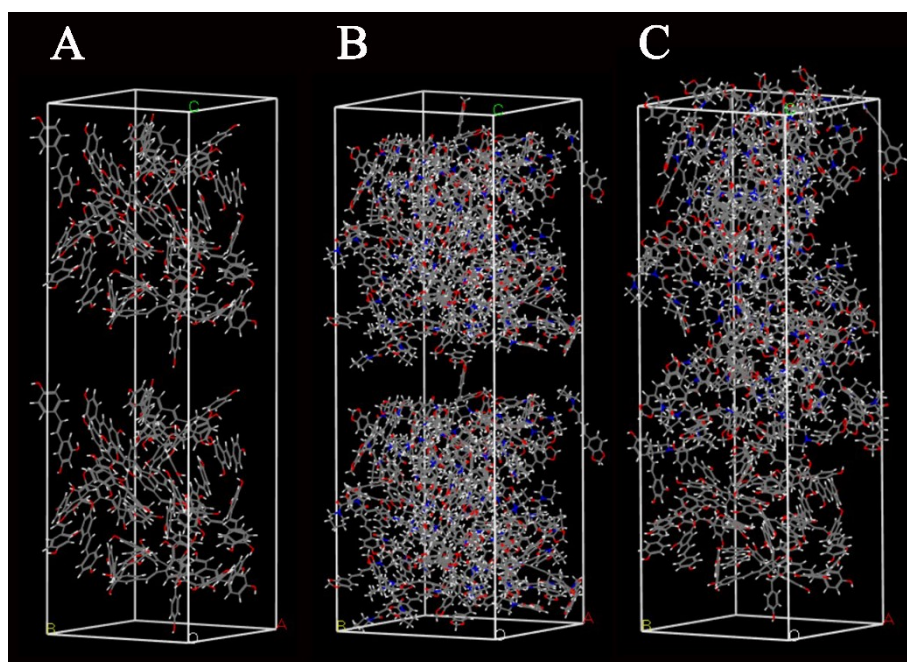

155

156 **Fig. S15** Equilibrium layered structures of (A) RES/RES, (B) PIP/PIP and (C) RES/PIP

157 at 310 K.

158

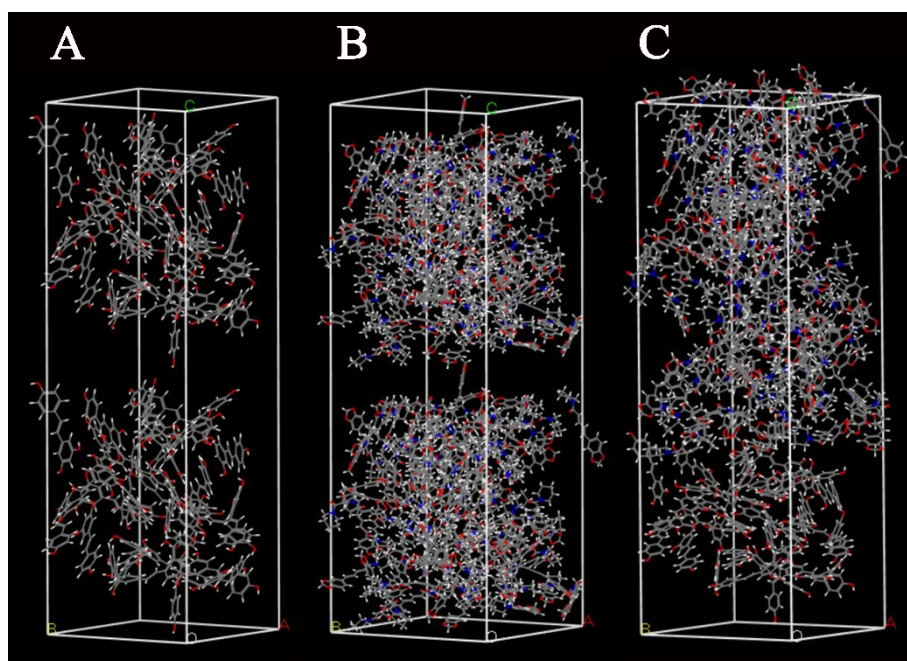

159

160 **Fig. S16** Equilibrium layered structures of (A) RES/RES, (B) PIP/PIP and (C) RES/PIP

161 at 318 K.

162

163

164 **Table S6** Binding energy ( $E_{\text{bind}}$ ) between components in the RES-PIP CM system at  
 165 different temperatures.

| Temperature | Sample  | Total energy/(kcal/mol) | Layer (1)/(kcal/mol) | Layer (2)/(kcal/mol) | $E_{\text{bind}}/(\text{kcal/mol})$ |
|-------------|---------|-------------------------|----------------------|----------------------|-------------------------------------|
| 298 K       | RES/RES | -1295.560               | -587.151             | -602.357             | 106.052                             |
|             | PIP/PIP | 7344.348                | 3714.363             | 3741.760             | 111.775                             |
|             | RES/PIP | 3073.013                | -417.476             | 4680.588             | 1190.099***                         |
| 310 K       | RES/RES | -1123.203               | -528.525             | -522.126             | 72.552                              |
|             | PIP/PIP | 7767.039                | 3983.376             | 4003.341             | 219.678                             |
|             | RES/PIP | 3375.837                | -337.898             | 4837.386             | 1123.651***                         |
| 318 K       | RES/RES | -1070.777               | -493.796             | -491.618             | 85.363                              |
|             | PIP/PIP | 8055.663                | 4183.959             | 4150.548             | 278.844                             |
|             | RES/PIP | 3549.504                | -299.958             | 4942.671             | 1093.209***                         |

166 \* $p < 0.05$ , \*\* $p < 0.01$ , compared to RES/RES. # $p < 0.05$ , ## $p < 0.01$ , compared to PIP/PIP.

167

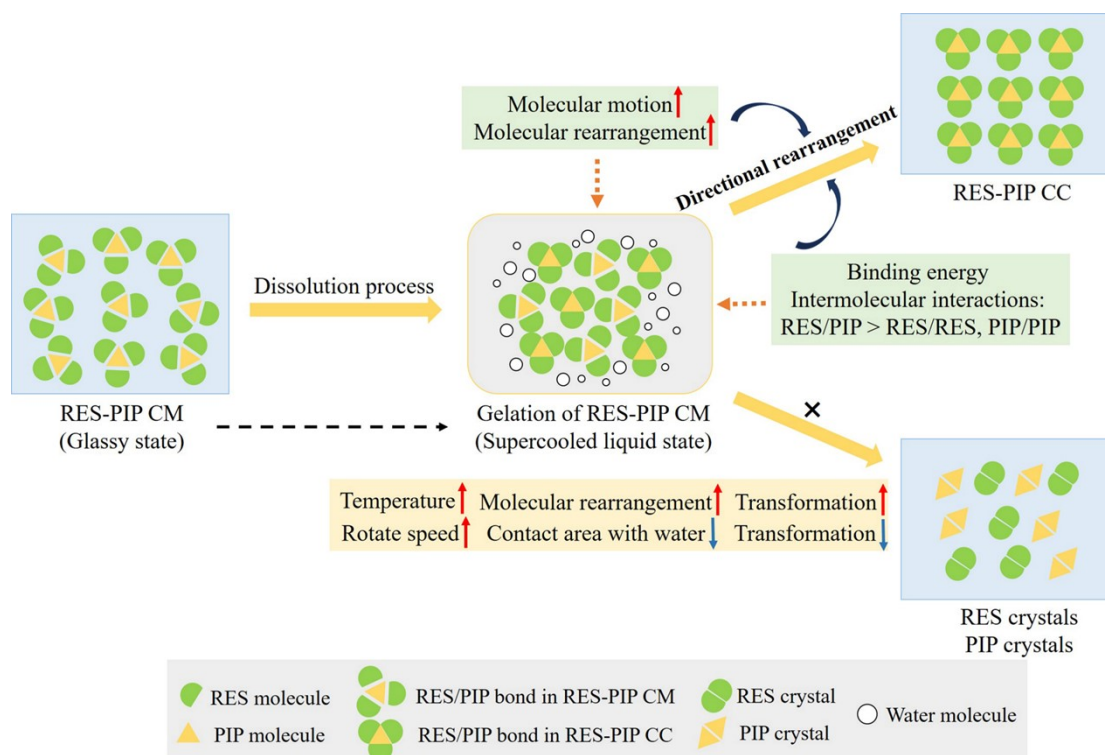

168

169 **Fig. S17** Proposed schematic diagram of transformation from RES-PIP CM to RES-  
 170 PIP CC during dissolution process.

171 **References**

- 172 1. B. H. Duan, Y. J. Shu, N. Liu, Y. Y. Lu, B. Z. Wang, X. M. Lu and J. Q. Zhang, *Rsc Adv.*,  
173 2018, **8**, 34690-34698.
- 174 2. G. Y. Hang, J. T. Wang, T. Wang, H. M. Shen, W. L. Yu and R. Q. Shen, *J. Mol. Model.*,  
175 2022, **28**, 58.
- 176 3. G. Y. Hang, W. L. Yu, T. Wang and J. T. Wang, *J. Mol. Model.*, 2019, **25**, 10.
- 177 4. G. Y. Hang, W. L. Yu, T. Wang, J. T. Wang and Z. Li, *J. Mol. Struct.*, 2017, **1141**, 577-583.
- 178 5. X. Zhao, X. Fu, G. Zhang, X. Liu and X. Fan, *ACS omega*, 2022, **7**, 7361-7369.
- 179 6. X. J. Wang and J. J. Xiao, *Struct. Chem.*, 2017, **28**, 1645-1651.
- 180 7. S. L. Xiong, S. S. Chen, S. H. Jin, Z. Zhang, Y. Zhang and L. J. Li, *Rsc Adv.*, 2017, **7**, 6795-  
181 6799.
- 182 8. K. P. Song, F. D. Ren, S. H. Zhang and W. J. Shi, *J. Mol. Model.*, 2016, **22**, 249.  
183
